# Supplementary material for: Suppressing interface recombination in CZTSSe solar cells by simple selenization with synchronous interface gradient doping
Source: Royal Society of Chemistry journal article supplement (doi:10.1039/d2nr06115e), 2022-11-26
Supplement: d2nr06115e1.pdf [file d2nr06115e1.pdf]

# Suppressing Interface Recombination in CZTSSe Solar Cells by Simple Selenization with Synchronous Interface Gradient Doping

Xin-Pan Cui<sup>†</sup>, Qiong Ma<sup>†</sup>, Wen-Hui Zhou<sup>\*</sup>, Dong-Xing Kou, Zheng-Ji Zhou, Yue-Na Meng, Ya-Fang Qi,

Sheng-Jie Yuan, Li-Tao Han and Si-Xin Wu<sup>\*\*</sup>

The Key Laboratory for Special Functional Materials of MOE, School of Materials, National & Local Joint Engineering Research Center for High-efficiency Display and Lighting Technology, Collaborative Innovation Center of Nano Functional Materials and Applications, Henan University, Kaifeng 475004, China

<sup>†</sup> These two authors contributed equally to this work.

<sup>\*</sup> Corresponding author. E-mail addresses: zhouwh@vip.henu.edu.cn (zhouwh@foxmail.com)

<sup>\*\*</sup> Corresponding author. E-mail addresses: wusixin@henu.edu.cn

## Contents:

**Figure S1.** XRD patterns (a) and enlarged (112) peak (b) of CZTSSe absorber with/without Cd gradient doping; Raman spectra (c) and enlarged peak at 201 cm<sup>-1</sup> (d) of the CZTSSe absorber with/without Cd gradient doping.

**Figure S2.**  $dV/dJ$  vs  $(J+J_{sc})^{-1}$  plots used to determine  $R_s$  and  $A$  (a)-(b);  $dJ/dV$  vs  $V$  curves used to calculate  $G_{sh}$  and  $R_{sh}$  (c)-(d);  $J+J_{sc}-GV$  vs  $V-R_sJ$  plots used to obtain  $J_0$ . All plots are deduced from the  $J$ - $V$  curves.

**Figure S3.** Nyquist plots of CZTSSe device with/without Cd gradient doping obtained at -0.4 V bias.

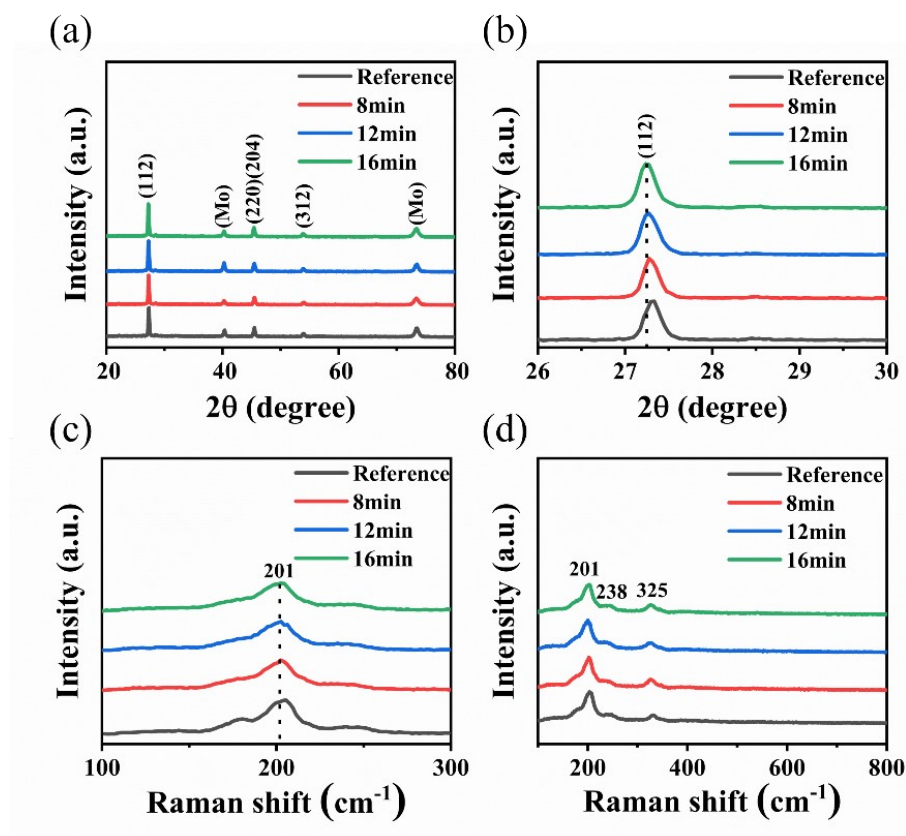

**Figure S1.** XRD patterns (a) and enlarged (112) peak (b) of CZTSSe absorber with/without Cd gradient doping; Raman spectra (c) and enlarged peak at 201  $\text{cm}^{-1}$  (d) of the CZTSSe absorber with/without Cd gradient doping.

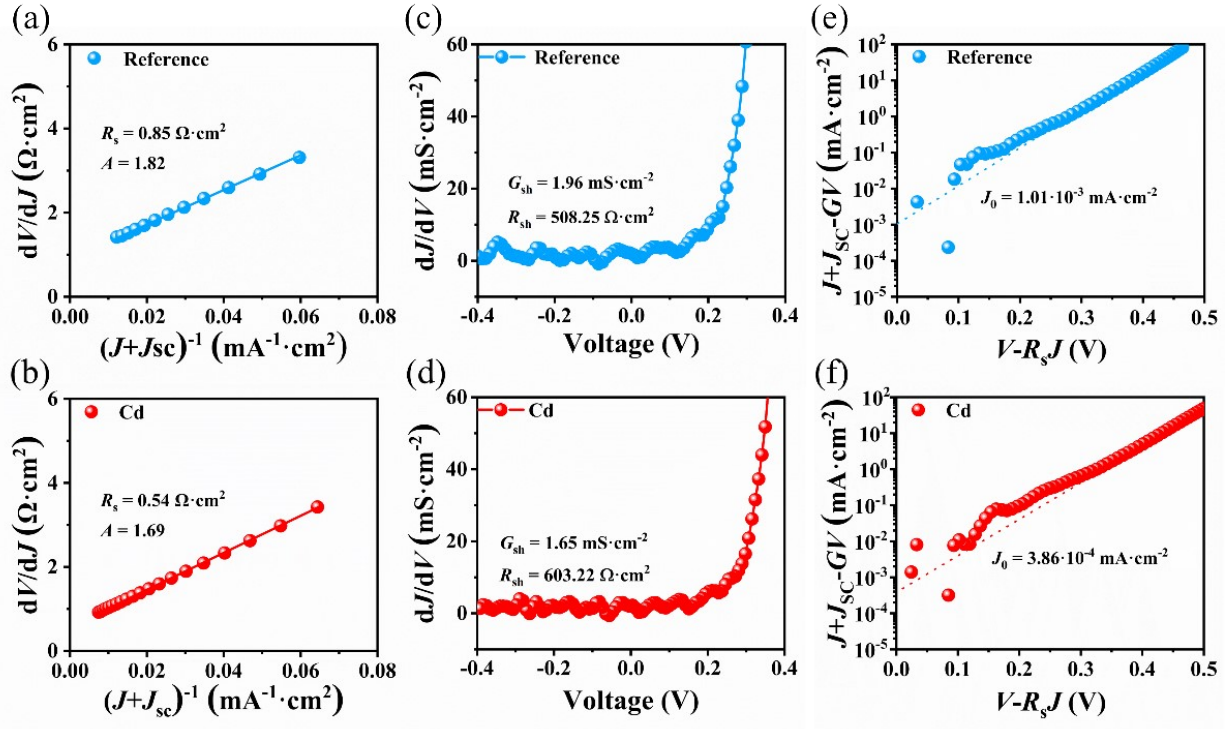

**Figure S2.**  $dV/dJ$  vs  $(J+J_{sc})^{-1}$  plots used to determine  $R_s$  and  $A$  (a)-(b);  $dJ/dV$  vs  $V$  curves used to calculate  $G_{sh}$  and  $R_{sh}$  (c)-(d);  $J+J_{sc}-GV$  vs  $V-R_sJ$  plots used to obtain  $J_0$ . All plots are deduced from the  $J-V$  curves.

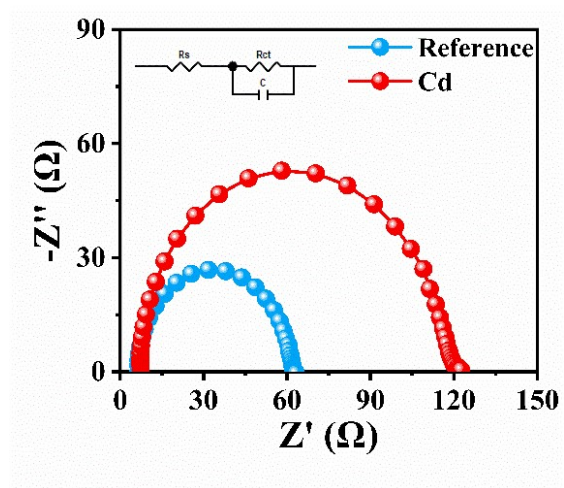

**Figure S3.** Nyquist plots of CZTSSe device with/without Cd gradient doping obtained at -0.4 V bias.
